# Supplementary material for: Contact properties of a low-resistance aluminum-based electrode with metal capping layers in vertical oxide thin-film transistors
Source: Royal Society of Chemistry journal article supplement (doi:10.1039/d3tc02880a), 2023-01-01
Supplement: d3tc02880a1.pdf [file d3tc02880a1.pdf]

## Supporting Information for:

# Contact Properties of a Low-resistance Aluminum-based Electrode with Metal Capping Layers in Vertical Oxide Thin-film Transistors

*Sori Jeon<sup>a</sup>, Kwang-Heum Lee<sup>a</sup>, Seung-Hee Lee<sup>a</sup>, Seong-In Cho<sup>a</sup>, Chi-Sun Hwang<sup>b</sup>, Jong Beom Ko<sup>\*,a</sup> and Sang-Hee Ko Park<sup>\*,a</sup>*

*<sup>a</sup>Department of Materials Science and Engineering, KAIST, 291 Daehak-Ro, Yuseong-Gu, Daejeon 34141, Republic of Korea*

*<sup>b</sup>Reality Display Device Research Section, ETRI, 218 Gajeong-Ro, Yuseong-Gu, Daejeon 305-700, Republic of Korea*

\*E-mail: [kojb914@kaist.ac.kr](mailto:kojb914@kaist.ac.kr), [shkp@kaist.ac.kr](mailto:shkp@kaist.ac.kr)

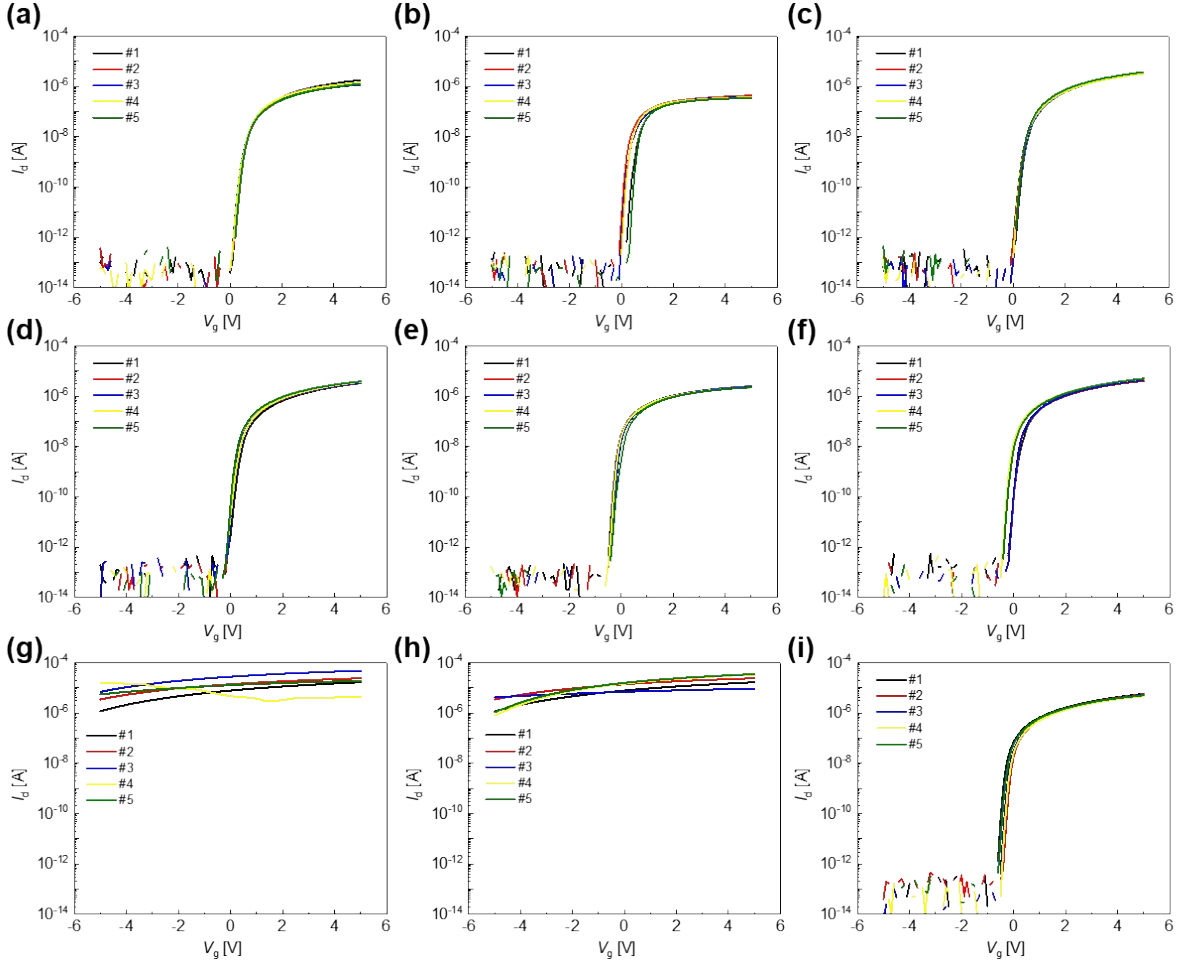

**Fig. S1.** Overlapped transfer curves of thin-film transistors (TFTs) with (a) Mo/Al/Mo, (b) Ti/Al/Ti, and (c) ITO source/drain (S/D) before annealing, (d) Mo/Al/Mo, (e) Ti/Al/Ti, and (f) ITO after annealing at 200 °C, and (g) Mo/Al/Mo, (h) Ti/Al/Ti, and (i) ITO S/D after annealing at 250 °C.

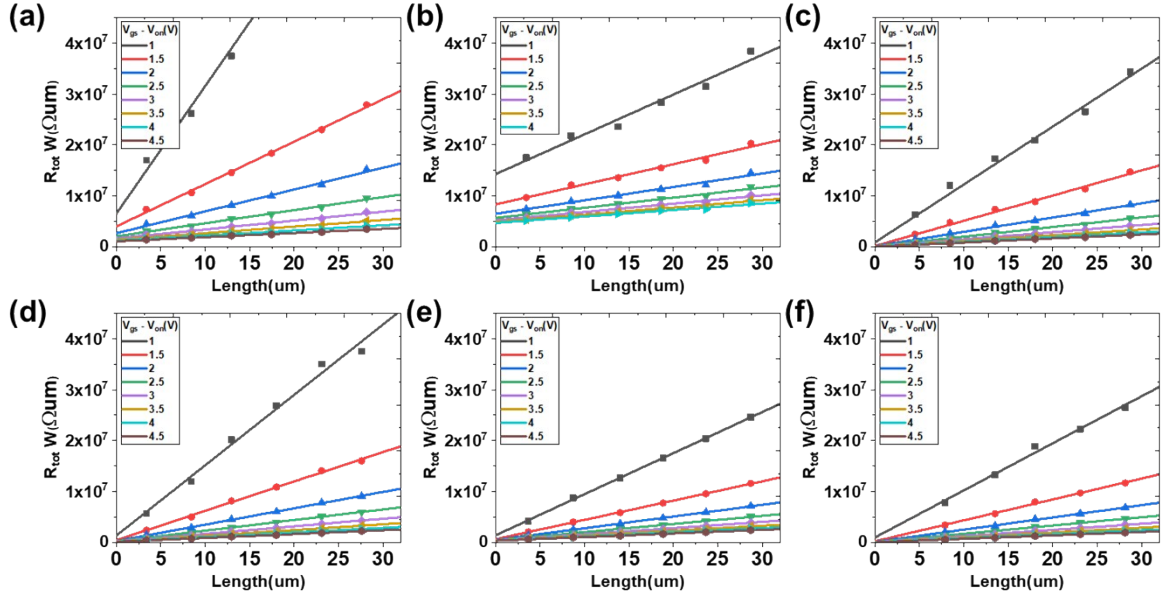

**Fig. S2.** Linear graphs of  $R_{tot} W$  versus the channel length ( $L$ ) in the top-gate bottom-contact (TGBC) thin-film transistors (TFTs) with (a) Mo/Al/Mo, (b) Ti/Al/Ti, and (c) ITO electrodes before annealing. The same relationship of the devices with (a) Mo/Al/Mo, (b) Ti/Al/Ti, and (c) ITO after annealing at 200 °C.

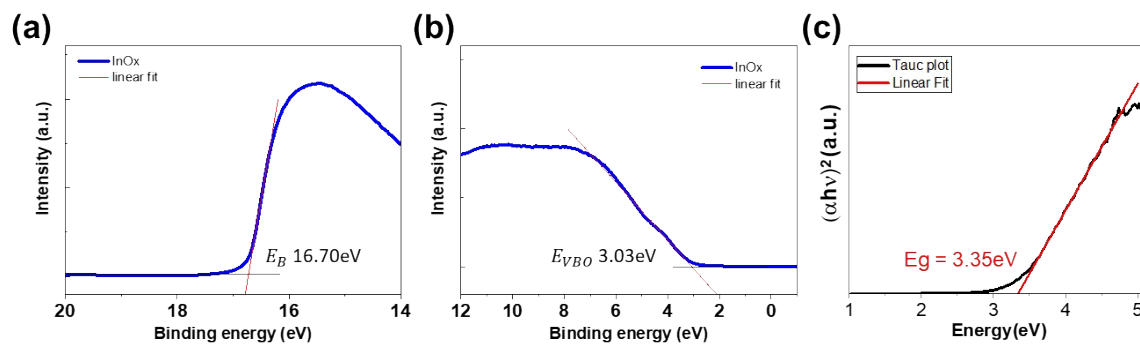

**Fig. S3.** Ultraviolet photoelectron spectroscopy (UPS) spectra of InO<sub>x</sub> at (a) higher binding energy edge of secondary electrons and (b) valence band edge region. (c) Tauc plot of InO<sub>x</sub> based on the transmission spectra to calculate the band gap.

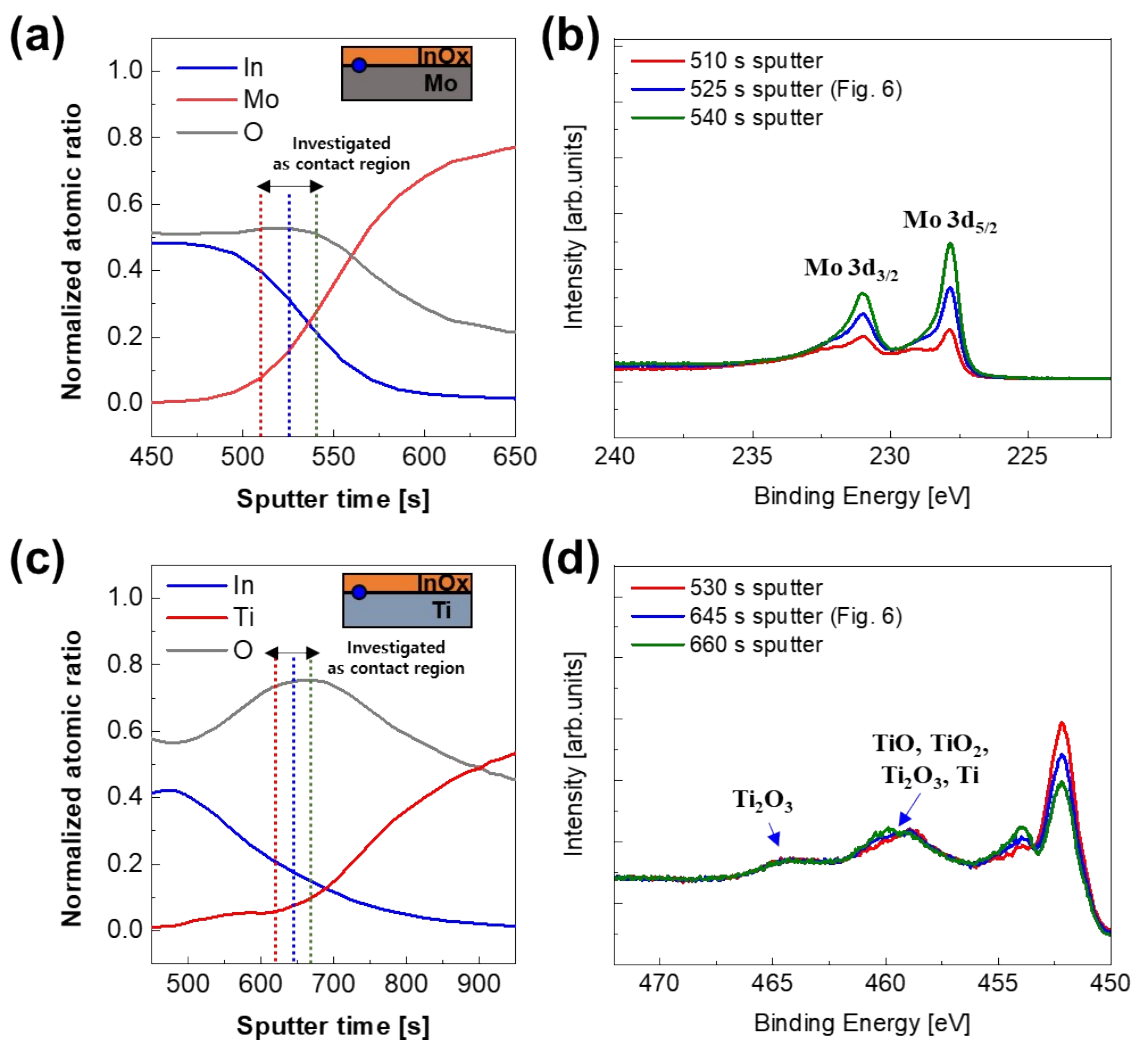

**Fig. S4.** X-ray photoelectron spectroscopy (XPS) depth profile for film stacks with (a) Mo and (c) Ti electrode. XPS spectra of metal peaks of (b) Mo 3d and (d) Ti 2p in approximate contact regions according to the sputtering times.

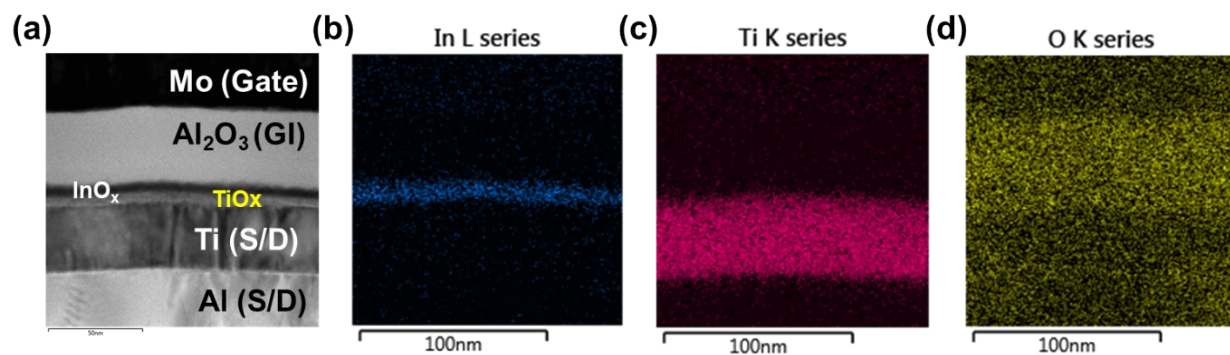

**Fig. S5.** (a) Cross-sectional high-resolution transmission electron microscopy (TEM) images of film stacks with Ti electrodes. The energy dispersive spectroscopy (EDS) mappings of (b) In, (c) Ti, and (d) O elements.

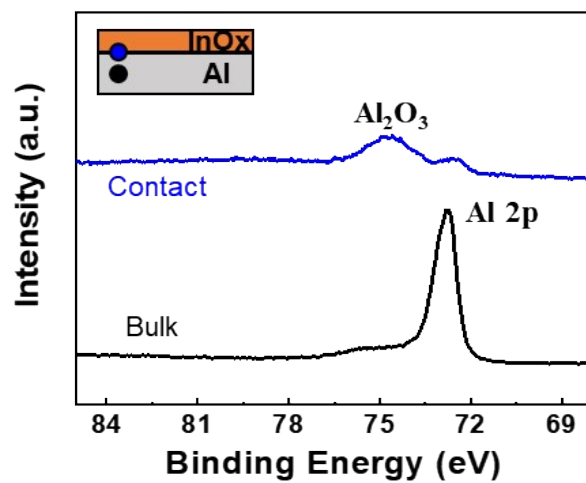

**Fig. S5.** X-ray photoelectron spectroscopy (XPS) spectra of Al peaks in the Al bulk metal region (black line) and contact region (blue line) with  $\text{InO}_x$ .
